# Supplementary material for: Effects of graphic organizers on aesthetic reading experience
Source: Frontiers journal article supplement (doi:10.3389/flang.2025.1472429), 2025-03-11
Supplement: Data_Sheet_1.docx [file Data_Sheet_1.docx]

**APPENDIX I: COMPREHENSION TEST**

**Instructions:** Please answer the following questions based on the text you read on the screen.

SUMMARY: Can you quickly summarise in a few words about what you read?

1. What is the important information we learn from Mrs. Bennet?

- Mr. Bingley is their new neighbour.
- She met Mrs. Long’s niece
- The inherited Netherfield

1. Mr. Bingley’s arrival is important to Mrs. Bennet because?

- He is a bachelor and needs to get married.
- He is rich and a married man
- She can get married to him

1. And what is the name of the Hall?

- Buckingham Place
- England Hall
- Netherfield

1. How many daughters does Mr. Bennet have?

- Three
- Four
- Five

1. What has he already done that pleases Mrs. Bennet?

- Found a new husband for his daughter
- Got dressed up
- Visited Netherfield Hall

1. Which of the following is not why Mr. Bennet disagreed with Mrs. Bennet’s plan?

- He does not take much interest in the marriages of his daughters
- He is ever prepared to make fun of his wide by opposing her, and her proposal gives him such a scope
- He is tired of doing this every time.

1. Which one of the following is not the description of Mr.Bennet by the author?

- Adventurous
- Caprice
- Sarcastic humor

1. How many nieces does Mrs. Long have?

- One
- Two
- Three

1. Finish the following sentence: ‘It is a universally acknowledged truth that...’

- ‘...a single man in possession of a good fortune must be in want of a wife.’
- ‘...marriage is overrated.’
- ‘...Jane Austen is a genius.’

1. What does Mrs. Bennet want Mr. Bennet to do in the first chapter of Pride and Prejudice?

- To let her and the five Bennet sisters visit Mr. Bingley
- To visit Mr. Bingley
- To write a letter to Mr. Bingley

1. Whom does Jane begin to fall in love with?

- Mr. Darcy
- Mr. Lucas
- Mr. Bingley

1. How many people was Mr.Bingley supposed to bring to the assembly

- Twelve ladies and seven gentlemen
- Twenty friends
- Two sisters and two brothers

1. How did Mrs. Bennet describe Mr.Darcy

- Handsome and charming man
- Most disagreeable and a horrid man
- A rude man worth pleasing

1. How many times did Jane dance with Mr.Bingley at the assembly

- One
- Two
- Three

VOCABULARY: Which words were used in this text

- Caprice
- Circumspection
- Counterpoise
- Deign
- Fastidious
- Fretfully
- Gruesome
- Raptures
- Retrench
- Scrupulous
- Stoutly
- Surmises
- Tiresome
- Upbraid
- Vexing
